# Supplementary material for: The structural and chemical basis of temporary adhesion in the sea star Asterina gibbosa
Source: publisher site journal article supplement (doi:10.3762/bjnano.9.196), 2018-07-30
Supplement: Additional file 1 [file 2190-4286-9-196-S1.pdf]

# Supporting Information

for

## The structural and chemical basis of temporary adhesion in the sea star *Asterina gibbosa*

Birgit Lengerer<sup>\*1</sup>, Marie Bonneel<sup>1</sup>, Mathilde Lefevre<sup>2</sup>, Elise Hennebert<sup>2</sup>, Philippe Leclère<sup>3</sup>, Emmanuel Gosselin<sup>4</sup>, Peter Ladurner<sup>5</sup> and Patrick Flammang<sup>\*1</sup>

Address: <sup>1</sup>Biology of Marine Organisms and Biomimetics Unit, Research Institute for Biosciences, University of Mons, 23 Place du Parc, 7000 Mons, Belgium, <sup>2</sup>Cell Biology Unit, Research Institute for Biosciences, University of Mons, 23 Place du Parc, 7000 Mons, Belgium, <sup>3</sup>Laboratory for Chemistry of Novel Materials, Center for Innovation and Research in Materials and Polymers (CIRMAP), University of Mons, 20 Place du Parc, 7000 Mons, Belgium, <sup>4</sup>Laboratory of Physics of Surfaces and Interfaces (LPSI), University of Mons, 23 Place du Parc, 7000 Mons, Belgium and <sup>5</sup>Institute of Zoology and Center of Molecular Bioscience Innsbruck, University of Innsbruck, Technikerstr. 25, A-6020 Innsbruck, Austria

E-mail: Birgit Lengerer<sup>\*</sup> - birgit.lengerer@umons.ac.be, Marie Bonneel - marie.bonneel@umons.ac.be, Mathilde Lefevre - mathilde.lefevre@umons.ac.be, Elise Hennebert - elise.hennebert@umons.ac.be, Philippe Leclère - philippe.leclere@umons.ac.be, Emmanuel Gosselin - emmanuel.gosselin@umons.ac.be, Peter Ladurner - peter.ladurner@uibk.ac.at, Patrick Flammang<sup>\*</sup> - patrick.flammang@umons.ac.be

\* Corresponding author

**Antibody labelling of tube foot sections**

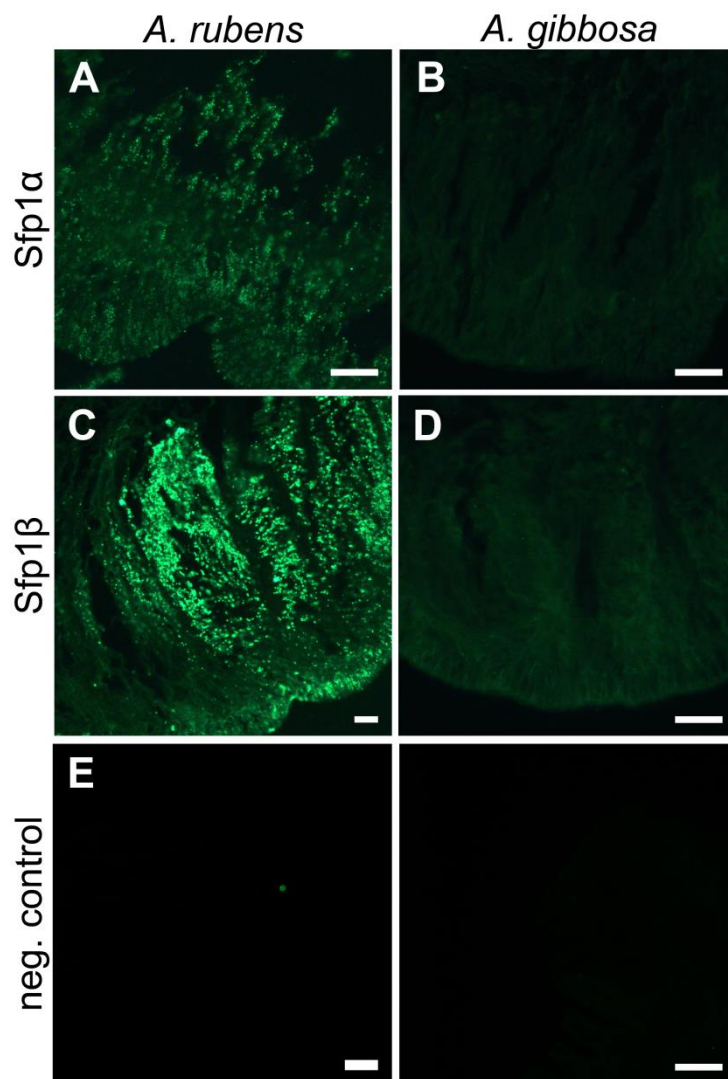

**Figure S1:** Antibody labelling of tube foot sections from *Asterias rubens* and *Asterina gibbosa*. Tube foot sections of *Asterias rubens* are on the left (A,C,E) and *Asterina gibbosa* to the right (B,D,F). Antibody directed against Sfp1 $\alpha$  (A,B), against Sfp1 $\beta$  (C,D) and negative controls skipping the primary antibody (E,F). Scale bars: 20  $\mu$ m.

**Table S1: Overview of lectin binding specificity according to manufacturer Vector laboratories.**

| <b>Lectin</b>                                         | <b>Acronym</b> | <b>Preferred sugar specificity</b>   | <b>Comments</b>                                                                                                                                                                                                                  |
|-------------------------------------------------------|----------------|--------------------------------------|----------------------------------------------------------------------------------------------------------------------------------------------------------------------------------------------------------------------------------|
| Concanavaline A                                       | Con A          | $\alpha$ Man, $\alpha$ Glc           | Recognizes $\alpha$ -linked mannose present as part of a core oligosaccharide in many serum and membrane glycoproteins                                                                                                           |
| Jacalin                                               | Jacalin        | Gal $\beta$ 3GalNAc                  | Binds also in the presence of conjugated sialic acid.                                                                                                                                                                            |
| Wheat germ agglutinin                                 | WGA            | GlcNAc                               | Preferable binds to dimer and trimers of GlcNAc. Can also bind terminal GlcNAc and chitobiose.                                                                                                                                   |
| <i>Datura Stramonium</i> lectin                       | DSL            | (GlcNAc) <sub>2-4</sub>              | Preferable binds to chitobiose or chitotriose over single GlcNAc residues.                                                                                                                                                       |
| Peanut agglutinin                                     | PNA            | Gal $\beta$ 3GalNAc                  | Does not bind in the presence of conjugated sialic acid.                                                                                                                                                                         |
| Soybean agglutinin                                    | SBA            | $\alpha$ > $\beta$ GalNAc            | Binds to oligosaccharide structures with terminal $\alpha$ - or $\beta$ -linked <i>N</i> -acetylgalactosamine, and to a lesser extent, galactose residues.                                                                       |
| <i>Griffonia (Bandeiraea) simplicifolia</i> lectin I  | GSL I          | $\alpha$ Gal, $\alpha$ GalNAc        | GSL I is a mixture of the five isolectins recognizing $\alpha$ Gal and $\alpha$ GalNAc.                                                                                                                                          |
| <i>Vicia villosa</i> agglutinin                       | VVA            | GalNAc                               | Recognizes preferentially $\alpha$ - or $\beta$ -linked terminal GalNAc, especially a single GalNAc residue linked to serine or threonine in a polypeptide.                                                                      |
| Succinylated wheat germ agglutinin                    | sWGA           | GlcNAc                               | This derivative does not bind to sialic acid residues, unlike the native form.                                                                                                                                                   |
| <i>Lens culinaris</i> agglutinin                      | LCA            | $\alpha$ Man, $\alpha$ Glc           | Recognizes sequences containing $\alpha$ Man residues but recognizes additional sugars as part of the receptor structure, giving it a narrower specificity than Con A.                                                           |
| <i>Pisum sativum</i> agglutinin                       | PSA            | $\alpha$ Man, $\alpha$ Glc           | Is nearly identical in structure and carbohydrate specificity to LCA.                                                                                                                                                            |
| <i>Ricinus communis</i> agglutinin                    | RCA I          | Gal, GalNAc                          | Binds to Gal or GalNAc residues of membrane glycoconjugates.                                                                                                                                                                     |
| <i>Griffonia (Bandeiraea) simplicifolia</i> lectin II | GSL II         | $\alpha$ or $\beta$ GlcNAc           | Is unique in its ability to recognize exclusively $\alpha$ - or $\beta$ -linked GlcNAc residues on the nonreducing terminal of oligosaccharides.                                                                                 |
| <i>Lycopersicon esculentum</i> (tomato) lectin        | LEL            | (GlcNAc) <sub>2-4</sub>              |                                                                                                                                                                                                                                  |
| Elderberry bark Lectin                                | EBL            | Neu5Ac $\alpha$ 6Gal/GalNAc          | Binds preferentially to sialic acid attached to terminal Gal in $\alpha$ -2,6 and to a lesser degree, $\alpha$ -2,3 linkage. This lectin does not appear to bind sialic acid linked to GalNAc.                                   |
| <i>Ulex europaeus</i> agglutinin 1                    | UEA 1          | L-Fuc                                | Binds to many glycoproteins and glycolipids containing $\alpha$ -linked fucose residues.                                                                                                                                         |
| <i>Maackia amurensis</i> lectin II                    | MAL II         | Neu5Ac $\alpha$ 3Gal $\beta$ 4GalNAc | Binds only particular carbohydrate structures that contain sialic acid. Unlike SNA which seems to prefer structures with ( $\alpha$ -2,6) linked sialic acid, MAL II appears to bind sialic acid in an ( $\alpha$ -2,3) linkage. |
| <i>Dolichos biflorus</i> agglutinin                   | DBA            | $\alpha$ GalNAc                      |                                                                                                                                                                                                                                  |
| <i>Sambucus nigra</i>                                 | SNA            | Neu5Ac $\alpha$ 6Gal/Gal             | Binds preferentially to sialic acid attached to terminal                                                                                                                                                                         |

|                                              |       |                                                                                                            |                                                                                                                                       |
|----------------------------------------------|-------|------------------------------------------------------------------------------------------------------------|---------------------------------------------------------------------------------------------------------------------------------------|
| agglutinin                                   |       | INAc                                                                                                       | Gal in $\alpha$ -2,6 and to a lesser degree, $\alpha$ -2,3 linkage. This lectin does not appear to bind sialic acid linked to GalNAc. |
| <i>Phaseolus vulgaris</i> erythro agglutinin | PHA-E | Gal $\beta$ 4GlcNAc $\beta$ 2Man $\alpha$ 6(GlcNAc $\beta$ 4)(GlcNAc $\beta$ 4Man $\alpha$ 3)Man $\beta$ 4 |                                                                                                                                       |
| <i>Phaseolus vulgaris</i> leuco agglutinin   | PHA-L | Gal $\beta$ 4GlcNAc $\beta$ 6(GlcNAc $\beta$ 2Man $\alpha$ 3)Man $\alpha$ 3                                |                                                                                                                                       |
| <i>Sophora Japonica</i> agglutinin           | SJA   | $\beta$ GalNAc                                                                                             |                                                                                                                                       |
| <i>Erythrina cristagalli</i> lectin          | ECL   | Gal $\beta$ 4GlcNAc                                                                                        | Sialic acid substitution appears to prevent the lectin from binding.                                                                  |
| <i>Solanum tuberosum</i> (potato) lectin     | STL   | (GlcNAc) $_2$ -4                                                                                           | Binds oligomers of GlcNAc and some bacterial cell wall oligosaccharides containing GlcNAc and <i>N</i> -acetylmuramic acid.           |

### Sugar Abbreviations:

|        |                                               |
|--------|-----------------------------------------------|
| Fuc    | L-Fucose                                      |
| Gal    | D-Galactose                                   |
| GalNAc | <i>N</i> -Acetylgalactosamine                 |
| Glc    | D-Glucose                                     |
| GlcNAc | <i>N</i> -Acetylglucosamine                   |
| Man    | Mannose                                       |
| Neu5Ac | <i>N</i> -Acetylneuraminic acid (sialic acid) |

**Lectin labelling of tube foot sections from *Asterina gibbosa*.**

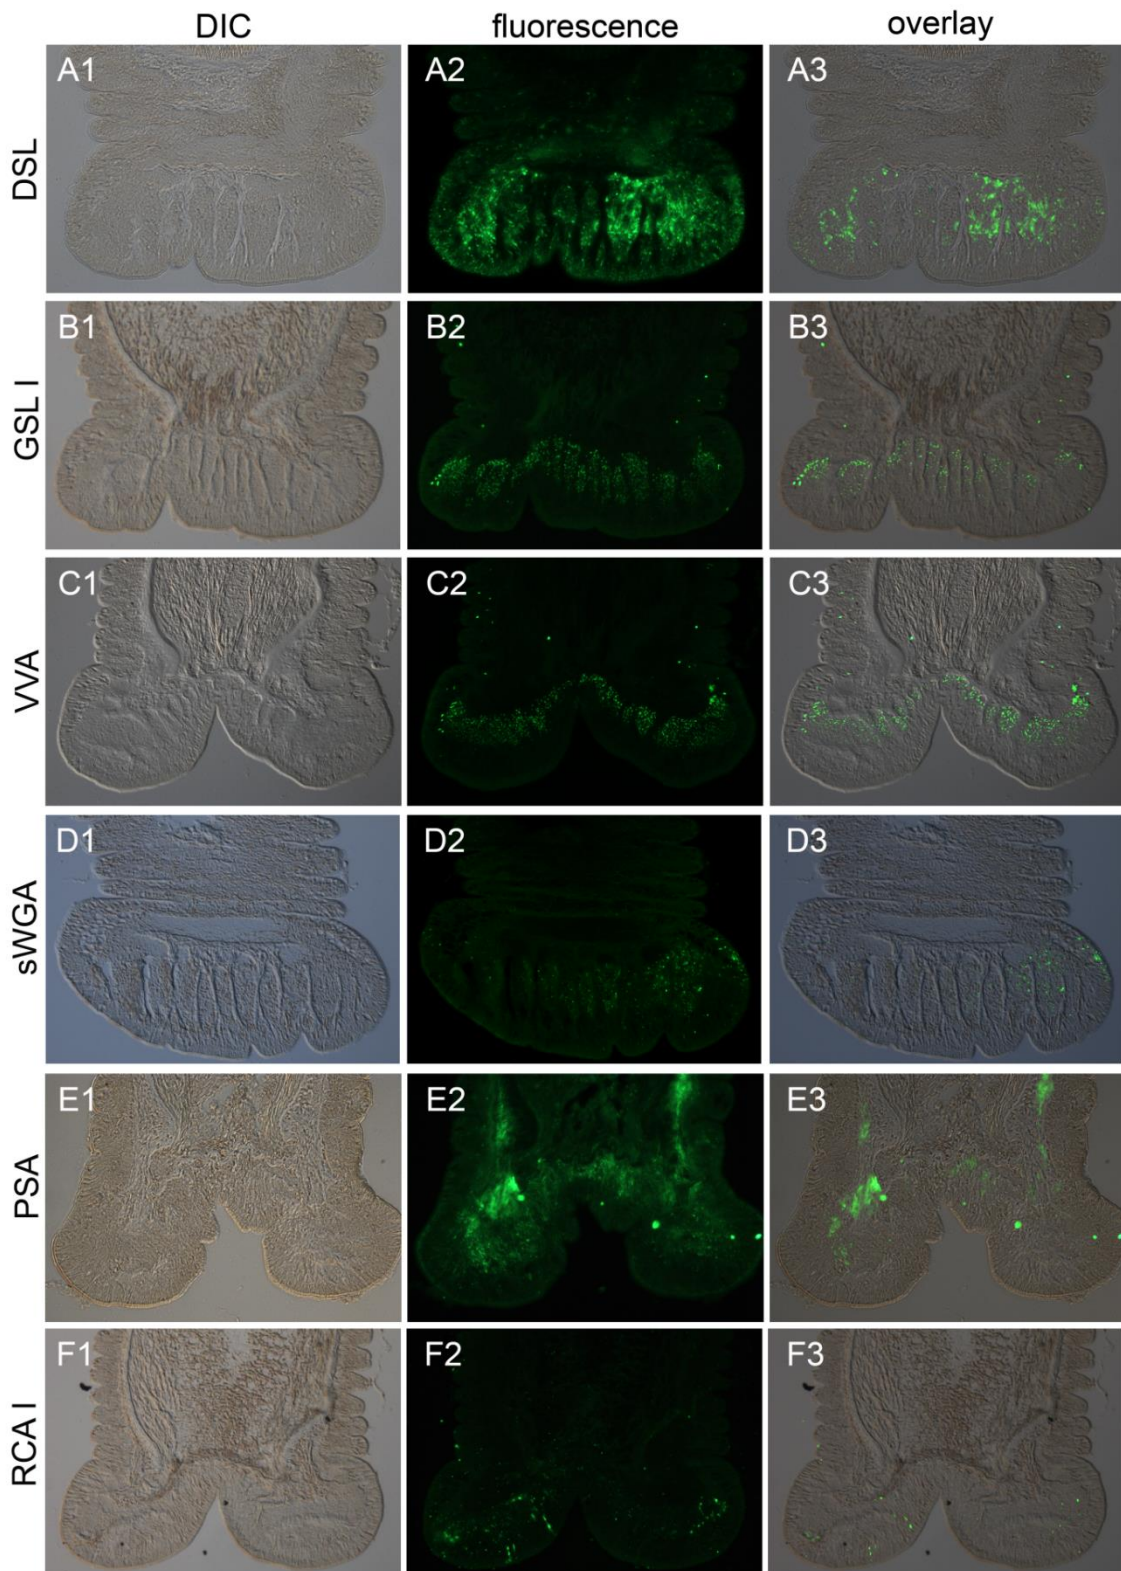

**Figure S2:** Lectin labelling of tube foot sections from *Asterina gibbosa*; with (A1-3) DSL, (B1-3) GSL I, (C1-3) VVA, (D1-3) sWGA, (E1-3) PSA, and (F1-3) RCA.

Lectin labelling of tube foot sections from *Asterina gibbosa*.

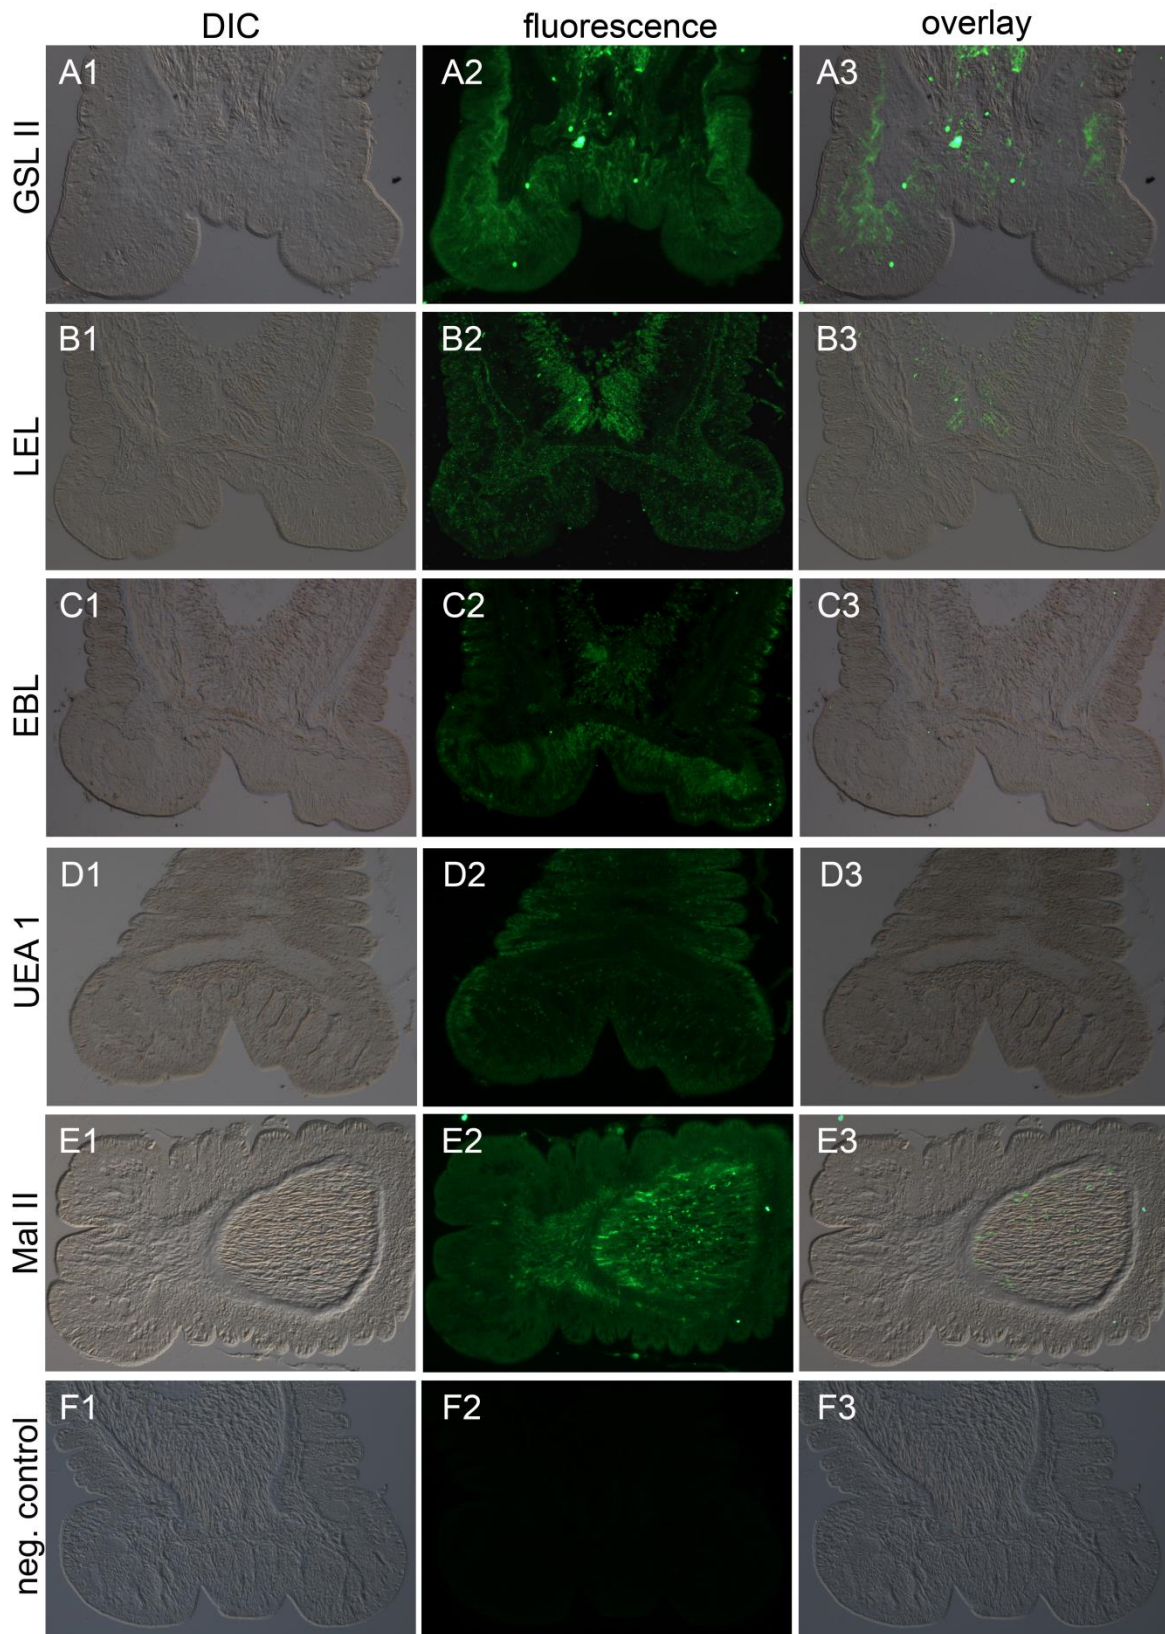

**Figure S3:** Lectin labelling of tube foot sections from *Asterina gibbosa*, with (A1-3) GSL II, (B1-3) LEL, (C1-3) EBL, (D1-3) UEA 1, (E1-3) Mal II and (F1-F3) negative control.
